# Supplementary material for: Maize Centromere Structure and Evolution: Sequence Analysis of Centromeres 2 and 5 Reveals Dynamic Loci Shaped Primarily by Retrotransposons
Source: PubMed Central journal article supplement (PMC2776974; doi:10.1371/journal.pgen.1000743), 2009-11-20
Supplement: pgen.1000743.s005.pdf [file pgen.1000743.s005.pdf]

**Table S1. Centromeric Repeat Junction Markers.** Markers are listed with the BACs from which they were derived, the two primer sequences used for amplification, amplicon size (in nt), marker type (P/A=presence/absence, SNP=single nucleotide polymorphism). The centromere to which each marker was mapped using the IBM mapping population is indicated by the marker name. Primer sequence in **bold** was used to sequence the SNP markers.

| Marker Name | Centromere | BAC Name (ZMMBB) | F Primer Sequence        | R Primer Sequence           | Amplicon Size (nt) | Type |
|-------------|------------|------------------|--------------------------|-----------------------------|--------------------|------|
| CenUH_01.1  | 1          | b0010G12         | GGAACCATTTCGTCGTTTTT     | GTGGATGTCTTCATCATGTGG       | 582                | P/A  |
| CenUH_01.2  | 1          | b0395M04         | TGTCCGCATCACCTAGGATA     | TCGGAATTGATGAAGACATCC       | 1851               | P/A  |
| CenUH_02.1  | 2          | b0061K01         | AATCTCCGCCATTCATCAAC     | GATGCAGTGTCTGGAAATGG        | 829                | P/A  |
| CenUH_02.2  | 2          | b0174C04         | TAGTCCATCCCTGCATTTGG     | GTTGATTTGTAGGGCGATGG        | 769                | P/A  |
| CenUH_02.3  | 2          | b0008G14         | GTAAACACACCCGCCACCAA     | CTCCCTGCTCCACCTCTTC         | 799                | P/A  |
| CenUH_02.4  | 2          | c0149I02         | GATTTTAGAAGAAAGTGCAAT    | GGGACGCTTCACCCTACCATG       | 506                | P/A  |
| CenUH_02.5  | 2          | c0154H24         | CGCAATTTCTGTTGCTGATAGA   | CATGGTCCCAATAGTCGGTAAC      | 166                | P/A  |
| CenUH_03.1  | 3          | c0024O03         | AGGATGTCCTCATCATTGGTTC   | CAAACACCAAAACACCAAAAGA      | 1356               | P/A  |
| CenUH_04.1  | 4          | c0382E13         | GTGATGTCCTCATCACTTCTTTTG | <b>CATCCGGTCCGTCTGATAGA</b> | 1689               | SNP  |
| CenUH_05.1  | 5          | c0026E18         | CACCAAGCACTACCGGAAT      | GTCATGCTATGATTGCCACTGA      | 1956               | P/A  |
| CenUH_06.1  | 6          | c0462I03         | GGATGTCTTCATCAGATCTCCAA  | ATGGGAAGTTTTGTTTATTTTCG     | 1452               | P/A  |
| CenUH_07.1  | 7          | b0346P08         | TGTCTTCATCAAAAAGTGAACA   | GGGTTTCATCAAATCCCTCGT       | 291                | P/A  |
| CenUH_07.2  | 7          | c0447A01         | CGAAGGTGTACGGGGAAATCTA   | GGTCGTCAGATCCCTGGTTACT      | 179                | P/A  |
| CenUH_08.1  | 8          | b0089F07         | GCCTATCAGCCTATCCCACA     | TGCTCACCTTGAGTGCAAAC        | 578                | P/A  |
| CenUH_09.1  | 9          | c0530C10         | GATGTCCGCATCAAATATGTCA   | CTGTTGGGTTTATCAGCTACCAA     | 816                | P/A  |
| CenUH_10.1  | 10         | b0410L22         | CCTAAGGACTCATGTAGAAGCCAA | GGGTGCACATCAATGAGCTTA       | 1438               | P/A  |
