# Supplementary material for: Maize Centromere Structure and Evolution: Sequence Analysis of Centromeres 2 and 5 Reveals Dynamic Loci Shaped Primarily by Retrotransposons
Source: PubMed Central journal article supplement (PMC2776974; doi:10.1371/journal.pgen.1000743), 2009-11-20
Supplement: pgen.1000743.s006.pdf [file pgen.1000743.s006.pdf]

**Table S2. Centromeric CRM2 Retrotransposon Display Markers.**

| Name <sup>1</sup> | GenBank Accession | BAC homology                | Size (nt) | ZmB73v1 <sup>2</sup> |
|-------------------|-------------------|-----------------------------|-----------|----------------------|
| 1_B_AGC204        | GF099546          | no hit                      | 204       | not mapped           |
| 2_B_TGC288        | GF099549          | CH201-137F12                | 288       | 89,307,454           |
| 2_B_AGC189        | GF099557          | CH201-517P4                 | 189       | 89,493,043           |
| 2_B_GCA370        | GF099559          | CH201-517P4                 | 370       | 89,493,286           |
| 2_B_AGC345        | GF099548          | CH201-154H24, CH201-32G21   | 345       | 89,829,383           |
| 2_B_ACC381        | GF099564          | CH201-154H24                | 381       | 89,956,571           |
| 2_B_GCA137        | GF099565          | CH201-552J10                | 137       | 90,099,795           |
| 2_B_ACC194        | GF099553          | CH201-320J2                 | 194       | 90,238,565           |
| 2_B_TTC348        | GF099562          | CH201-394D7                 | 349       | 90,398,487           |
| 2_B_TCG152        | GF099554          | CH201-363H22                | 152       | 90,495,479           |
| 2_B_TGC260        | GF099555          | CH201-363H22                | 260       | 90,599,109           |
| 2_B_TGC205        | GF099551          | ZMMBBb-597K2, CH201-530G19  | 205       | 90,741,817           |
| 2_B_TTC183        | GF099560          | CH201-534P5                 | 182       | 91,050,633           |
| 2_B_GAC236        | GF099561          | CH201-534P5                 | 236       | 91,092,651           |
| 2_B_TGC178        | GF099550          | CH201-363H22                | 178       | not mapped           |
| 2_B_TCG138        | GF099556          | CH201-530G19                | 138       | not mapped           |
| 2_B_TGC188        | GF099558          | CH201-527D12                | 188       | not mapped           |
| 2_B_GCA241        | GF099563          | CH201-394D7                 | 241       | not mapped           |
| 3_B_ACC205        | GF099568          | CH201-475I18                | 205       | 95,027,347           |
| 3_B_AGC310        | GF099571          | ZMMBBb-173J13               | 310       | 94,880,056           |
| 3_B_ACC245        | GF099572          | CH201-475I18                | 245       | 95,084,182           |
| 3_B_AGC144        | GF099569          | ZMMBBb-464B16               | 144       | not mapped           |
| 4_B_TGC394        | GF099575          | ZMMBBb-522G8                | 394       | 104,339,158          |
| 5_B_TCG278        | GF099578          | CH201-425C22, CH201-730I0   | 278       | 101,481,735          |
| 5_B_ACC300        | GF099580          | CH201-124L17                | 300       | 102,113,056          |
| 5_B_TCG181        | GF099579          | CH201-124L17                | 181       | 102,115,031          |
| 6_B_TCG146        | GF099584          | CH201-567C5, CH201-430O5    | 146       | 50,002,743           |
| 6_B_ACC241        | GF099582          | ZMMBBb-597K2, CH201-530G19  | 241       | not mapped           |
| 8_B_TGC202        | GF099590          | CH201-118G24                | 202       | 46,572,507           |
| 8_B_TGC354        | GF099591          | CH201-104L24                | 354       | 46,739,414           |
| 8_B_ACC181        | GF099585          | CH201-104L24, ZMMBBb-472G24 | 181       | 46,815,061           |
| 8_B_ACC165        | GF099594          | no hit                      | 165       | 47,014,890           |
| 8_B_ACC361        | GF099593          | CH201-161G22                | 361       | 47,463,710           |
| 8_B_TGC318        | GF099588          | CH201-161G22                | 318       | 47,463,754           |
| 8_B_TCG175        | GF099587          | CH201-161G22                | 175       | 47,531,459           |
| 8_B_ACC348        | GF099592          | CH201-161G22                | 348       | 47,531,459           |
| 8_B_ACC225        | GF099586          | CH201-161G22, ZMMBBb-76N16  | 225       | 47,619,173           |
| 8_B_AGC374        | GF099589          | CH201-325A22                | 374       | not mapped           |
| 10_B_AGC240       | GF099596          | CH201-419B14                | 240       | 59,053,330           |
| 10_B_AGC221       | GF099595          | CH201-364K15                | 221       | 60,397,027           |

<sup>1</sup> Marker name consists of chromosome to which marker mapped in the IBM mapping population, inbred (B = B73), selective trinucleotide used for band amplification, and sequence length, separated by “\_”.

<sup>2</sup> Reference chromosome coordinates are indicated when marker mapped to the correct reference chromosome with the highest bitscore (BLASTN).
