# Supplementary material for: Maize Centromere Structure and Evolution: Sequence Analysis of Centromeres 2 and 5 Reveals Dynamic Loci Shaped Primarily by Retrotransposons
Source: PubMed Central journal article supplement (PMC2776974; doi:10.1371/journal.pgen.1000743), 2009-11-20
Supplement: pgen.1000743.s007.pdf [file pgen.1000743.s007.pdf]

**Table S3. CENH3 and centromeric repeat density of the two chromosome arms and the centromere region of chromosome 2.** CENH3 density is reported as the number of anti-CENH3 reads mapped per 100kb window using MUMmer averaged either over an entire arm or centromere region. Centromeric repeats are reported as total number of nucleotides per chromosome section.

|                  | Short arm | Centromere | Long arm  |
|------------------|-----------|------------|-----------|
| Coordinates (Mb) | 87.1-89.3 | 89.3-91.1  | 91.1-93.5 |
| CENH3 density    | 2.11      | 62.8       | 2.08      |
| CRM1             | 31,874    | 209,986    | 55,057    |
| CRM2             | 40,773    | 290,413    | 23,078    |
| CRM3             | 0         | 0          | 0         |
| CRM4             | 7,272     | 3,924      | 538       |
| CentC            | 0         | 31550      | 0         |
