# Supplementary material for: Maize Centromere Structure and Evolution: Sequence Analysis of Centromeres 2 and 5 Reveals Dynamic Loci Shaped Primarily by Retrotransposons
Source: PubMed Central journal article supplement (PMC2776974; doi:10.1371/journal.pgen.1000743), 2009-11-20
Supplement: pgen.1000743.s008.pdf [file pgen.1000743.s008.pdf]

**Table S4. CENH3 and centromeric repeat density of the two chromosome arms and the three distinct centromere regions of chromosome 5.** CENH3 density is reported as the number of anti-CENH3 reads mapped per 100kb window using MUMmer, averaged either over an entire arm or centromere region. Centromeric repeats are reported as total number of nucleotides per chromosome section.

|                  | Short arm  | "L"         | "I"         | "R"         | Long arm    |
|------------------|------------|-------------|-------------|-------------|-------------|
| Coordinates (Mb) | 99.3-101.6 | 101.6-104.8 | 104.8-107.6 | 107.6-108.6 | 108.6-111.1 |
| CENH3 density    | 1.89       | 38.97       | 4.79        | 31.50       | 1.78        |
| CRM1             | 7,600      | 155,697     | 314,534     | 6,377       | 6,617       |
| CRM2             | 34,271     | 219,806     | 22,717      | 0           | 5,476       |
| CRM3             | 0          | 12,268      | 29,926      | 0           | 0           |
| CRM4             | 24,151     | 15,583      | 10,207      | 6,775       | 2,685       |
| CentC            | 8,313      | 0           | 81,280      | 0           | 0           |
