# Supplementary material for: Maize Centromere Structure and Evolution: Sequence Analysis of Centromeres 2 and 5 Reveals Dynamic Loci Shaped Primarily by Retrotransposons
Source: PubMed Central journal article supplement (PMC2776974; doi:10.1371/journal.pgen.1000743), 2009-11-20
Supplement: pgen.1000743.s010.pdf [file pgen.1000743.s010.pdf]

**Table S6. Number and type of retrotransposons identified in and near centromeres 2 and 5.** LTR pairs within the centromere 2 (87.1 Mb – 93.5 Mb) and centromere 5 (99.3 Mb – 111.1 Mb) regions were identified computationally (see methods) and assigned to an LTR retrotransposon class.

| Element    | Cent2 | Cent5 |
|------------|-------|-------|
| 13075      | 13    | 50    |
| 13268      | 11    | 1     |
| bak1       | 11    | 19    |
| cinful     | 12    | 27    |
| danelle    | 2     | 6     |
| grande     | 4     | 11    |
| gyma       | 5     | 7     |
| ji         | 8     | 15    |
| opie       | 5     | 12    |
| shadow     | 3     | 10    |
|            |       |       |
| Other:     | 5     | 17    |
| 13370      | 0     | 2     |
| fourf      | 1     | 0     |
| giepium    | 0     | 1     |
| huck       | 0     | 2     |
| klause     | 0     | 2     |
| machieveli | 0     | 2     |
| reiver     | 0     | 3     |
| rire       | 1     | 1     |
| tim        | 1     | 2     |
| zeon       | 2     | 2     |
