# Supplementary material for: Maize Centromere Structure and Evolution: Sequence Analysis of Centromeres 2 and 5 Reveals Dynamic Loci Shaped Primarily by Retrotransposons
Source: PubMed Central journal article supplement (PMC2776974; doi:10.1371/journal.pgen.1000743), 2009-11-20
Supplement: pgen.1000743.s012.pdf [file pgen.1000743.s012.pdf]

**Table S8. Oat-maize addition line (OMA) markers used to anchor centromere 5 BAC clones.** Mapping primers were designed on genic, non-genic single copy or non-genic low copy sequences. Two PCRs were performed for each primer pair, one using OMA-5 and a second using B73 genomic DNA, and amplicons were sequenced in both directions. In all cases the sequences derived from B73 and OMA-5 genomic DNA were identical. Primer c05-08-3-f-1 was replaced with primer c05-08-3-f-2 (AGGCAGATATGGCACCTGTC) for sequencing because of poor sequence quality obtained with the former.

| MarkerName | BAC Accession Number | Start  | End    | Product size | Primer ID    | Primer sequence       | Primer type           |
|------------|----------------------|--------|--------|--------------|--------------|-----------------------|-----------------------|
| OMA_5.01   | AC207875.2           | 133787 | 134006 | 220          | c05-01-2-f-1 | CCGTAATCTGCTGCACTTCA  | Non-genic single copy |
|            |                      |        |        |              | c05-01-2-r-1 | CGATCATCACCAGACCAATG  | Non-genic single copy |
| OMA_5.02   | AC207875.2           | 95373  | 95717  | 345          | c05-01-1-f-1 | CTAGCAAGGATGGCTCTTGG  | Non-genic single copy |
|            |                      |        |        |              | c05-01-1-r-1 | AGTGACCGAGCTCCAACCTC  | Non-genic single copy |
| OMA_5.03   | AC197005.3           | 51436  | 52182  | 747          | c05-02-2-f-1 | ATTGCAAGTTCTGGGAGCTG  | Genic                 |
|            |                      |        |        |              | c05-02-2-r-1 | TACCCGGATGGAATGACAAT  | Non-genic single copy |
| OMA_5.04   | AC197005.3           | 51454  | 52182  | 729          | c05-02-2-f-2 | TGGACACCGATCATGACTTC  | Genic                 |
|            |                      |        |        |              | c05-02-2-r-1 | TACCCGGATGGAATGACAAT  | Non-genic single copy |
| OMA_5.05   | AC182837.4           | 154823 | 156318 | 1496         | c05-08-3-f-1 | GCTGTGCAGCTTTTAGCACA  | Non-genic low copy    |
|            |                      |        |        |              | c05-08-3-r-1 | TTGGATGAAATTCACCGTCA  | Non-genic low copy    |
| OMA_5.06   | AC196438.3           | 95667  | 96207  | 541          | c05-10-2-f-1 | GTTTCCCTGGTGCATACGAC  | Genic                 |
|            |                      |        |        |              | c05-10-2-r-1 | CAAGCAATTGAAGGACACGA  | Non-genic single copy |
| OMA_5.07   | AC196438.3           | 95667  | 96248  | 582          | c05-10-2-f-1 | GTTTCCCTGGTGCATACGAC  | Genic                 |
|            |                      |        |        |              | c05-10-2-r-2 | CGCCGTCTTCACTTTTAGGA  | Non-genic single copy |
| OMA_5.08   | AC196144.3           | 95168  | 96044  | 877          | c05-21-2-f-1 | CTCGTCCGTGGAAAAATCC   | Non-genic single copy |
|            |                      |        |        |              | c05-21-2-r-1 | GAGGGAGGGAGAGAAACAGC  | Genic                 |
| OMA_5.09   | AC196144.3           | 95387  | 96044  | 658          | c05-21-2-f-2 | CGTTCCTCAATTCAGCAGTC  | Non-genic single copy |
|            |                      |        |        |              | c05-21-2-r-1 | GAGGGAGGGAGAGAAACAGC  | Genic                 |
| OMA_5.10   | AC182108.3           | 122183 | 122511 | 329          | c05-24-2-f-1 | TCGTGTCCAAGTCTCATTGG  | Non-genic single copy |
|            |                      |        |        |              | c05-24-2-r-1 | TGGATACGTCACATGCTTTCT | Non-genic single copy |

Table S8 - continued

| MarkerName | BAC Accession Number | Start | End   | Product size | Primer ID    | Primer sequence         | Primer type           |
|------------|----------------------|-------|-------|--------------|--------------|-------------------------|-----------------------|
| OMA_5.11   | AC182108.3           | 43393 | 43565 | 173          | c05-24-3-f-1 | GCATCATTAGAAGCGGAAGC    | Non-genic single copy |
|            |                      |       |       |              | c05-24-3-r-1 | CACTTTCGGTCCATTCTGCT    | Non-genic single copy |
| OMA_5.12   | AC216805.3           | 20707 | 20107 | 601          | Chr5R_1_F    | TAGCATTCTGCCCTGCTTT     | Genic                 |
|            |                      |       |       |              | Chr5R_1_R    | TGACAAATCCTAATGGTGGGATA | Genic                 |
| OMA_5.13   | AC216805.3           | 7458  | 6489  | 970          | Chr5R_2_F    | ACAGTGGTTGGTCCTCCAAG    | Genic                 |
|            |                      |       |       |              | Chr5R_2_R    | ACCCTCCAATCAGTGCATTC    | Genic                 |
| OMA_5.14   | AC202102.4           | 42835 | 42059 | 777          | Chr5R_3_F    | CAGTAAGCATGCACCGACAT    | Genic                 |
|            |                      |       |       |              | Chr5R_3_R    | ACAAATTTCCGATGGTTGGA    | Genic                 |
| OMA_5.15   | AC217238.3           | 38995 | 38743 | 253          | Chr5R_4_F    | GAATTGGTCTTAACCCGAGGA   | Genic                 |
|            |                      |       |       |              | Chr5R_4_R    | TCGACTTCTCCACCATCTCC    | Genic                 |
