# Supplementary material for: Maize Centromere Structure and Evolution: Sequence Analysis of Centromeres 2 and 5 Reveals Dynamic Loci Shaped Primarily by Retrotransposons
Source: PLoS Genet. 2009 Nov 20;5(11):e1000743. doi: 10.1371/journal.pgen.1000743 (PMC2776974; doi:10.1371/journal.pgen.1000743)
Supplement: Table S5 — Maximal centromeric repeat (CRM and CentC) content of any 100 kb window within centromeres 110. (0.04 MB PDF) [file pgen.1000743.s009.pdf]

**Table S5. Maximal centromeric repeat (CRM and CentC) content of any 100 kb window within centromeres 1-10.**

| chromosome | % of 100kb window homologous to CRM or CentC |
|------------|----------------------------------------------|
| 1          | 82.5                                         |
| 2          | 71.1                                         |
| 3          | 58.9                                         |
| 4          | 63.0                                         |
| 5          | 68.3                                         |
| 6          | 59.6                                         |
| 7          | 80.8                                         |
| 8          | 31.8                                         |
| 9          | 91.4                                         |
| 10         | 85.3                                         |
