# Supplementary material for: Maize Centromere Structure and Evolution: Sequence Analysis of Centromeres 2 and 5 Reveals Dynamic Loci Shaped Primarily by Retrotransposons
Source: PLoS Genet. 2009 Nov 20;5(11):e1000743. doi: 10.1371/journal.pgen.1000743 (PMC2776974; doi:10.1371/journal.pgen.1000743)
Supplement: Table S7 — Molecular markers used for anchoring chromosome 2 and 5 centromere regions. (0.04 MB PDF) [file pgen.1000743.s011.pdf]

**Table S7. Molecular markers used for anchoring chromosome 2 and 5 centromere regions.** For details, please see Tables S1, S2 and S8.

| Centromere | Marker Type | Marker Name | Reference Chromosome<br>Start Coordinate |
|------------|-------------|-------------|------------------------------------------|
| 2          | RJ          | CenUH_02.2  | 85392883                                 |
|            | TD          | 2_B_TGC288  | 89307454                                 |
|            | TD          | 2_B_AGC189  | 89493043                                 |
|            | TD          | 2_B_GCA370  | 89493286                                 |
|            | TD          | 2_B_AGC345  | 89829383                                 |
|            | RJ          | CenUH_02.5  | 89875635                                 |
|            | TD          | 2_B_ACC381  | 89956571                                 |
|            | RJ          | CenUH_02.3  | 90060298                                 |
|            | TD          | 2_B_GCA137  | 90099795                                 |
|            | TD          | 2_B_ACC194  | 90238565                                 |
|            | TD          | 2_B_TTC348  | 90398487                                 |
|            | TD          | 2_B_TCG152  | 90495479                                 |
|            | TD          | 2_B_TGC260  | 90599109                                 |
|            | TD          | 2_B_TGC205  | 90741817                                 |
|            | TD          | 2_B_TTC183  | 91050633                                 |
|            | TD          | 2_B_GAC236  | 91092651                                 |
|            | RJ          | CenUH_02.1  | 91100242                                 |
|            | RJ          | CenUH_02.4  | 96005366                                 |
| 5          | genetic     | TIDP7094    | 99733088                                 |
|            | OMA         | OMA_5.01    | 100787067                                |
|            | OMA         | OMA_5.02    | 100803288                                |
|            | OMA         | OMA_5.03    | 100930854                                |
|            | OMA         | OMA_5.04    | 100930854                                |
|            | TD          | 5_B_TCG278  | 101481735                                |
|            | OMA         | OMA_5.05    | 101806921                                |
|            | OMA         | OMA_5.06    | 102032973                                |
|            | OMA         | OMA_5.07    | 102032973                                |
|            | TD          | 5_B_ACC300  | 102113056                                |
|            | TD          | 5_B_TCG181  | 102115031                                |
|            | OMA         | OMA_5.08    | 103305541                                |
|            | OMA         | OMA_5.09    | 103305541                                |
|            | OMA         | OMA_5.10    | 103937408                                |
|            | OMA         | OMA_5.11    | 103993212                                |
|            | RJ          | CenUH_05.1  | 105154866                                |
|            | OMA         | OMA_5.12    | 107010368                                |
|            | OMA         | OMA_5.13    | 107023617                                |
|            | OMA         | OMA_5.14    | 107686916                                |
|            | OMA         | OMA_5.15    | 107901023                                |
|            | genetic     | IDP8659     | 110637623                                |

OMA = oat maize addition, RJ = repeat junction, TD = transposon
